# Supplementary material for: C-di-GMP regulates Pseudomonas aeruginosa stress response to tellurite during both planktonic and biofilm modes of growth
Source: PubMed Central journal article supplement (PMC4438720; doi:10.1038/srep10052), 2015-05-20
Supplement: srep10052-s1.pdf [file srep10052-s1.pdf]

**C-di-GMP regulates *Pseudomonas aeruginosa* stress response to tellurite during both planktonic and biofilm modes of growth**

Song Lin Chua<sup>1,2</sup>, Krishnakumar Sivakumar<sup>1,3</sup>, Morten Rybtke<sup>4</sup>, Mingjun Yuan<sup>1</sup>,  
Jens Bo Andersen<sup>4</sup>, Thomas E. Nielsen<sup>1,8</sup>, Michael Givskov<sup>1,4</sup>, Tim Tolker-Nielsen<sup>4</sup>,  
Bin Cao<sup>1,5\*</sup>, Staffan Kjelleberg<sup>1,6</sup>, Liang Yang<sup>1,7\*</sup>

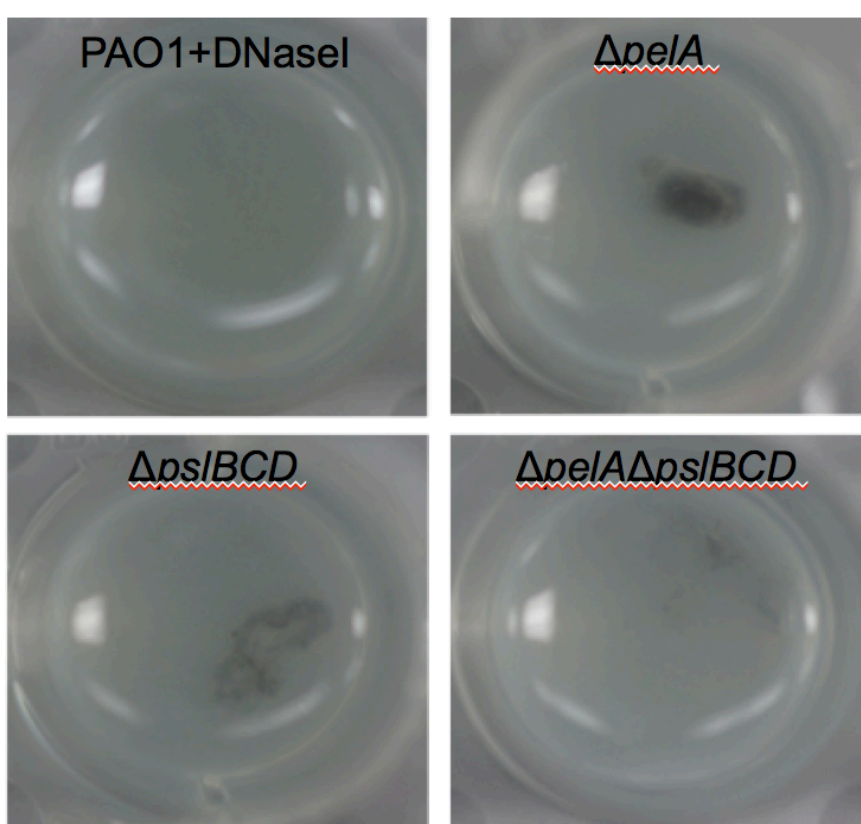

**Figure S1.** Aggregates formed by *P. aeruginosa* wild-type PAO1 strain and the polysaccharide mutants in ABTGC medium with 10  $\mu\text{g/ml}$   $\text{TeO}_3^{2-}$  after 1 day under shaking condition. 10  $\mu\text{g/ml}$  DNaseI was added to the PAO1 cultures. Representative image from triplicate experiments was shown for each condition.

**Table S1 Up regulated proteins by tellurite**

| Gene number and protein function                            | Peptides(95%) | %Cov(95) | +Tel/-Tel | PVal     |
|-------------------------------------------------------------|---------------|----------|-----------|----------|
| PA0572 hypothetical protein                                 | 250           | 82.88    | 99.08319  | 5.04E-05 |
| PA2402 probable non ribosomal peptide synthetase            | 16            | 4.914    | 35.31832  | 0.008042 |
| PA2424 PvdL                                                 | 42            | 12.14    | 30.76097  | 6.62E-08 |
| PA2760 OprQ                                                 | 24            | 39.53    | 28.84031  | 0.012788 |
| PA0563 hypothetical protein                                 | 6             | 12.98    | 28.84     | 0.0127   |
| PA4225 pyochelin synthetase                                 | 2             | 24.43    | 28.31392  | 0.007283 |
| PA4624 cyclic diguanylate regulated TPS partner B, CdrB     | 27            | 20.07    | 25.8226   | 4.17E-06 |
| PA4226 dihydroaeruginosic acid synthetase                   | 7             | 36.93    | 25.8226   | 9.06E-05 |
| PA0999  $\beta$ -oxoacyl-[acyl-carrier-protein]synthase III | 56            | 11.57    | 25.11886  | 6.70E-06 |
| PA3327 probable non ribosomal peptide synthetase            | 2             | 17.3     | 23.7684   | 0.039298 |
| PA2386 L-ornithineN5-oxygenase                              | 42            | 38.15    | 23.12065  | 8.48E-07 |
| PA2399 pyoverdine synthetase D                              | 21            | 25.2     | 22.69865  | 0.002347 |
| PA4224 pyochelin biosynthetic protein PchG                  | 29            | 20.92    | 22.49055  | 0.001658 |
| PA0090 ClpV1                                                | 6             | 15.63    | 22.49055  | 0.000166 |
| PA2400 PvdJ                                                 | 11            | 7        | 20.89296  | 0.00982  |
| PA4661 LipidA 3-O-deacylase                                 | 13            | 48.55    | 19.23092  | 0.023034 |
| PA3038 probable porin                                       | 15            | 13.78    | 18.03018  | 8.10E-07 |
| PA2398 ferripyoverdine receptor                             | 14            | 50.18    | 15.99558  | 0.002339 |
| PA2853 Outermembrane lipoprotein OprI precursor             | 5             | 45.78    | 14.99685  | 0.008247 |
| PA3483 hypothetical protein                                 | 97            | 18.42    | 14.58814  | 0.002669 |
| PA1742 Glutamineamido transferase class I                   | 4             | 15       | 13.80384  | 0.018477 |
| PA3335 hypothetical protein                                 | 58            | 16.8     | 13.67729  | 2.24E-13 |
| PA2815 probable acyl-CoA dehydrogenase                      | 26            | 36.56    | 13.67729  | 0.047206 |
| PA3329 hypothetical protein                                 | 33            | 26.24    | 12.13389  | 7.29E-12 |
| PA1271 probable tonB-dependent receptor                     | 4             | 6.331    | 12.02264  | 0.005989 |
| PA0079 TssK1                                                | 4             | 9.459    | 11.80321  | 0.009242 |
| PA4221 Fe(III)-pyochelin outer membrane receptor precu      | 2             | 54.86    | 11.69499  | 0.002462 |
| PA0595 organic solvent tolerance protein OstA precursor     | 3             | 24.78    | 11.37627  | 0.0013   |
| PA2391 probable outer membrane protein precursor            | 53            | 45.36    | 10.86426  | 1.01E-08 |
| PA3724 elastase LasB                                        | 16            | 35.54    | 10.86426  | 0.010083 |
| PA0427 Major intrinsic multiple antibiotic resistance efflu | 3             | 37.53    | 10.47129  | 0.006546 |
| PA2366 uricase PvuD                                         | 14            | 6.478    | 10.18591  | 2.91E-07 |
| PA3344 ATP-dependentDNA helicase RecQ                       | 3             | 3.371    | 9.908319  | 0.034625 |
| PA0973 Peptidoglycan associated lipoprotein OprL precu      | 92            | 46.43    | 9.817479  | 4.44E-16 |
| PA0958 Basicamino acid, basic peptide and imipenem ou       | 84            | 46.73    | 9.817479  | 0.003556 |
| PA3186 Glucose/carbohydrate outer membrane porin Op         | 6             | 38.11    | 9.727472  | 0.007463 |
| PA2302 AmbE                                                 | 22            | 3.861    | 9.120109  | 0.003599 |
| PA2330 hypothetical protein                                 | 3             | 15.77    | 9.120109  | 0.015323 |
| PA3408 Heme uptake outer membrane receptor HasR pr          | 5             | 14.48    | 8.709636  | 0.003476 |
| PA5016 dihydrolipoamide acetyltransferase                   | 18            | 48.26    | 8.472274  | 3.57E-08 |
| PA1061 conserved hypothetical protein                       | 63            | 67.4     | 8.317637  | 0.005835 |
| PA3790 Putative copper transport outer membrane porir       | 16            | 54.08    | 8.090959  | 0.013769 |
| PA3836 hypothetical protein                                 | 4             | 48.31    | 8.090959  | 0.002906 |
| PA3728 hypothetical protein                                 | 4             | 1.833    | 8.016781  | 0.047031 |
| PA1377 conserved hypothetical protein                       | 2             | 68.36    | 8.016781  | 0.003154 |
| PA3729 conserved hypothetical protein                       | 376           | 6.686    | 7.870458  | 7.12E-09 |
| PA0807 AmpDh3                                               | 2             | 51.76    | 7.798301  | 0.009569 |
| PA3194 phosphogluconate dehydratase                         | 36            | 49.84    | 7.244359  | 0.000351 |

|        |                                                |    |       |          |          |
|--------|------------------------------------------------|----|-------|----------|----------|
| PA3332 | conserved hypothetical protein                 | 27 | 37.59 | 7.112135 | 7.07E-06 |
| PA0622 | probable bacteriophage protein                 | 26 | 48.96 | 6.668067 | 6.88E-07 |
| PA4792 | conserved hypothetical protein                 | 12 | 50.8  | 6.426877 | 0.007643 |
| PA0041 | probable hemagglutinin                         | 7  | 19.77 | 6.309574 | 0.008558 |
| PA4676 | probable carbonic anhydrase                    | 4  | 68.37 | 6.309574 | 0.023276 |
| PA4015 | conserved hypothetical protein                 | 36 | 51.66 | 6.251727 | 0.01664  |
| PA0084 | TssC1                                          | 9  | 17.47 | 6.251727 | 0.000131 |
| PA1338 | gamma-glutamyltranspeptidaseprecursor          | 31 | 19.03 | 6.025596 | 1.60E-08 |
| PA4694 | ketol-acidreductoisomerase                     | 45 | 65.98 | 6.025596 | 0.022332 |
| PA3238 | hypothetical protein                           | 25 | 15.67 | 5.754399 | 4.86E-06 |
| PA1579 | hypothetical protein                           | 19 | 56.44 | 5.597576 | 0.008136 |
| PA0662 | N-acetyl-gamma-glutamyl-phosphatereductase     | 57 | 76.74 | 5.445026 | 5.26E-06 |
| PA5076 | probable binding protein component of ABC tran | 14 | 58.27 | 5.345644 | 0.00502  |
| PA4475 | conserved hypothetical protein                 | 3  | 36.88 | 5.296635 | 0.024291 |
| PA4732 | glucose-6-phosphateisomerase                   | 9  | 32.31 | 5.248075 | 0.004052 |
| PA4483 | Glu-tRNA(Gln) amido transferase subunit A      | 4  | 60.74 | 5.152287 | 0.002782 |

**Table S2 Down regulated proteins by tellurite**

| Gene number and protein function | Peptides(95%)                                    | %Cov(95) | +Tel/-Tel | PVal     |          |
|----------------------------------|--------------------------------------------------|----------|-----------|----------|----------|
| PA0141                           | conserved hypothetical protein                   | 11       | 34.23     | 0.025823 | 0.000204 |
| PA4687                           | ferric iron-binding periplasmic protein HitA     | 11       | 30.45     | 0.025823 | 0.000294 |
| PA4352                           | conserved hypothetical protein                   | 36       | 64.34     | 0.031333 | 8.93E-05 |
| PA2951                           | electrontransfer flavoprotein alpha-subunit      | 52       | 73.79     | 0.039446 | 0.004405 |
| PA4064                           | probable ATP-binding component of ABC transp     | 7        | 55.56     | 0.048753 | 0.000648 |
| PA4263                           | 50S ribosomal protein L3                         | 7        | 37.44     | 0.060256 | 0.006212 |
| PA0430                           | 5,10-methylenetetrahydrofolate reductase         | 8        | 42.76     | 0.060814 | 0.025942 |
| PA1586                           | dihydrolipoamide succinyltransferase (E2 subunit | 35       | 62.35     | 0.061376 | 0.002073 |
| PA5015                           | pyruvate dehydrogenase                           | 46       | 36.96     | 0.066069 | 8.21E-12 |
| PA4671                           | probable ribosomal protein L25                   | 24       | 79.9      | 0.06792  | 1.38E-05 |
| PA1245                           | AprX                                             | 75       | 60.14     | 0.068549 | 0.0008   |
| PA4244                           | 50S ribosomal protein L15                        | 7        | 40.97     | 0.069183 | 0.013156 |
| PA1171                           | probable transglycolase                          | 5        | 20.6      | 0.071779 | 0.023444 |
| PA5554                           | ATP synthase beta chain                          | 95       | 78.17     | 0.074473 | 5.58E-06 |
| PA5173                           | carbamate kinase                                 | 6        | 23.23     | 0.07656  | 0.014051 |
| PA3005                           | beta-N-acetyl-D-glucosaminidase                  | 3        | 8.133     | 0.07656  | 0.018277 |
| PA5556                           | ATP synthase alpha chain                         | 72       | 53.5      | 0.080168 | 0.00031  |
| PA0395                           | twitching motility protein PilT                  | 10       | 38.37     | 0.087096 | 0.001232 |
| PA2967                           | 3-oxoacyl-[acyl-carrier-protein]reductase        | 9        | 39.27     | 0.087096 | 0.023841 |
| PA4277                           | elongation factor Tu                             | 211      | 70.53     | 0.087902 | 0.000138 |
| PA5171                           | arginine deiminase                               | 80       | 69.38     | 0.090365 | 6.57E-10 |
| PA4587                           | cytochrome c551 peroxidase precursor             | 13       | 47.11     | 0.093756 | 0.013287 |
| PA0372                           | probable zinc protease                           | 4        | 17.2      | 0.097275 | 0.012433 |
| PA1800                           | trigger factor                                   | 13       | 38.76     | 0.099083 | 0.00019  |
| PA1789                           | hypothetical protein                             | 13       | 39.02     | 0.099083 | 0.014599 |
| PA3637                           | CTP synthase                                     | 16       | 35.42     | 0.100925 | 2.12E-05 |
| PA1923                           | hypothetical protein                             | 26       | 24.04     | 0.105682 | 0.004861 |
| PA4639                           | hypothetical protein                             | 8        | 45.13     | 0.105682 | 0.001514 |
| PA3263                           | conserved hypothetical protein                   | 6        | 26.14     | 0.105682 | 0.009988 |
| PA4756                           | carbamoylphosphate synthetase large subunit      | 18       | 18.73     | 0.108643 | 0.00092  |
| PA4260                           | 50S ribosomal protein L2                         | 12       | 30.4      | 0.109648 | 0.002423 |

|                                                          |    |       |          |          |
|----------------------------------------------------------|----|-------|----------|----------|
| PA4170 hypothetical protein                              | 8  | 34.19 | 0.113763 | 0.047994 |
| PA4771 L-lactate dehydrogenase                           | 8  | 32.02 | 0.115878 | 0.001434 |
| PA3187 probable ATP-binding component of ABC transp      | 11 | 23.06 | 0.120226 | 0.023461 |
| PA5427 alcohol dehydrogenase                             | 17 | 52.92 | 0.121339 | 0.000618 |
| PA2744 threonyl-tRNA synthetase                          | 7  | 17.5  | 0.125893 | 0.037254 |
| PA5215 glycine-cleavagesystem protein T1                 | 3  | 10    | 0.12942  | 0.025444 |
| PA4063 hypothetical protein                              | 6  | 25    | 0.130617 | 0.019117 |
| PA3653 ribosome recycling factor                         | 8  | 42.7  | 0.131826 | 0.003174 |
| PA0956 prolyl-tRNA synthetase                            | 19 | 37.65 | 0.139316 | 4.70E-06 |
| PA2393 probable dipeptidase precursor                    | 13 | 33.93 | 0.140605 | 0.001438 |
| PA0764 negative regulator for alginate biosynthesis Mucl | 7  | 30.06 | 0.140605 | 0.021213 |
| PA1546 oxygen-independent coproporphyrinogen III oxid:   | 4  | 11.96 | 0.140605 | 0.012304 |
| PA0887 acetyl-coenzyme A synthetase                      | 21 | 33.95 | 0.144544 | 0.000498 |
| PA0337 phosphoenolpyruvate-protein phosphotransfera:     | 9  | 15.55 | 0.145881 | 0.000231 |
| PA2642 NADH dehydrogenase I chain G                      | 32 | 33.48 | 0.149969 | 2.91E-05 |
| PA1459 probable methyltransferase                        | 5  | 18.75 | 0.155597 | 0.023353 |
| PA2290 glucose dehydrogenase                             | 39 | 43.71 | 0.157036 | 0.001152 |
| PA0459 probable ClpA/B protease ATP binding subunit      | 21 | 28.35 | 0.158489 | 5.60E-06 |
| PA5054 heat shock protein HslU                           | 6  | 16.55 | 0.159956 | 0.001317 |
| PA5172 ornithine carbamoyl transferase, catabolic        | 83 | 65.48 | 0.167494 | 1.11E-08 |
| PA0296 Glutamylpolyamine synthetase                      | 4  | 13.1  | 0.169044 | 0.01579  |
| PA2952 electron transfer flavoprotein beta-subunit       | 26 | 74.3  | 0.172187 | 0.000366 |
| PA0668 tyrosyl-tRNA synthetase 2                         | 7  | 19.05 | 0.175388 | 0.029985 |
| PA4310 chemotactic transducer PctB                       | 14 | 23.21 | 0.177011 | 0.023584 |
| PA4542 ClpB protein                                      | 15 | 25.29 | 0.187068 | 0.000668 |
| PA4932 50S ribosomal protein L9                          | 7  | 56.76 | 0.187068 | 0.007105 |
| PA4386 GroES protein                                     | 4  | 52.58 | 0.187068 | 0.031502 |
| PA0265 succinate-semialdehyde dehydrogenase              | 34 | 60.46 | 0.190546 | 3.84E-06 |
| PA3183 glucose-6-phosphate 1-dehydrogenase               | 20 | 56.24 | 0.192309 | 0.000856 |
| PA0295 probable periplasmic polyamine binding protein    | 10 | 35.41 | 0.192309 | 0.016069 |
| PA5493 DNA polymerase I                                  | 13 | 18.4  | 0.195884 | 0.001282 |
| PA1787 aconitate hydratase 2                             | 46 | 36.13 | 0.199526 | 0.001423 |
| PA4423 conserved hypothetical protein                    | 14 | 36.59 | 0.199526 | 3.90E-05 |
| PA2968 malonyl-CoA-[acyl-carrier-protein]transacylase    | 13 | 44.23 | 0.199526 | 0.020452 |
